# Supplementary material for: Morphologic control of Sb-rich Sb2Se3 to adjust its catalytic hydrogenation properties for p-nitrophenol
Source: Royal Society of Chemistry journal article supplement (doi:10.1039/c4ra11068d), 2014-01-01
Supplement: c4ra11068d1.pdf [file c4ra11068d1.pdf]

### Electronic supplementary information

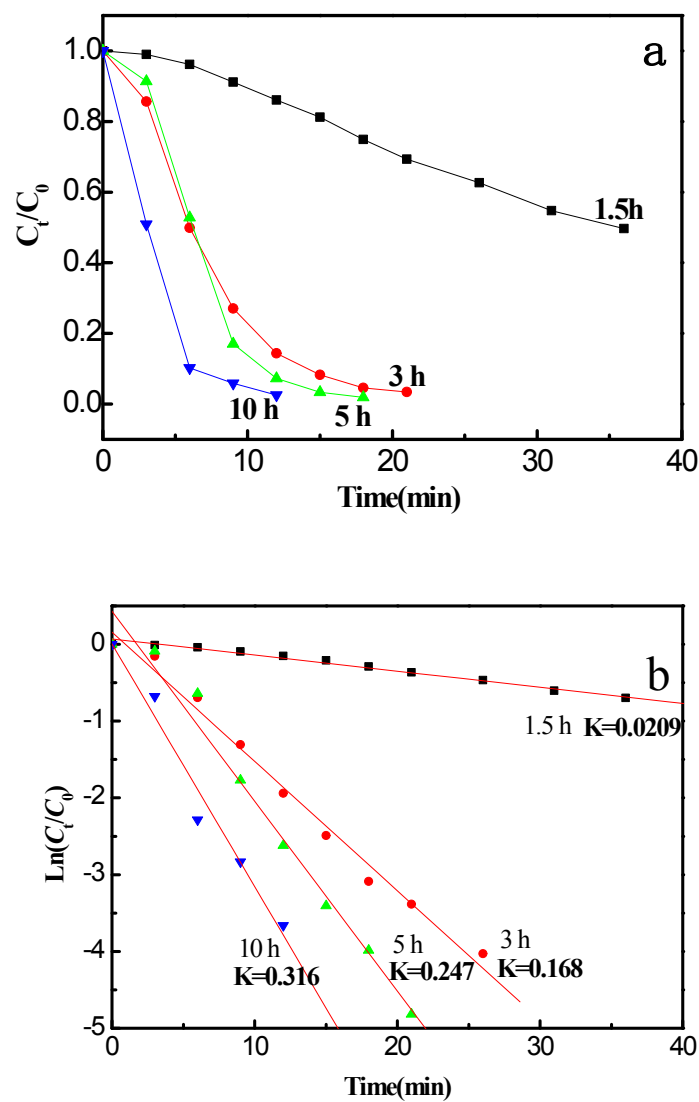

Fig. 1S Plot of (a)  $(c_t/c_0)$  versus reaction time and (b)  $\ln(c_t/c_0)$  versus reaction time in the presence of the  $Sb_2Se_3$  for different hydrothermal times

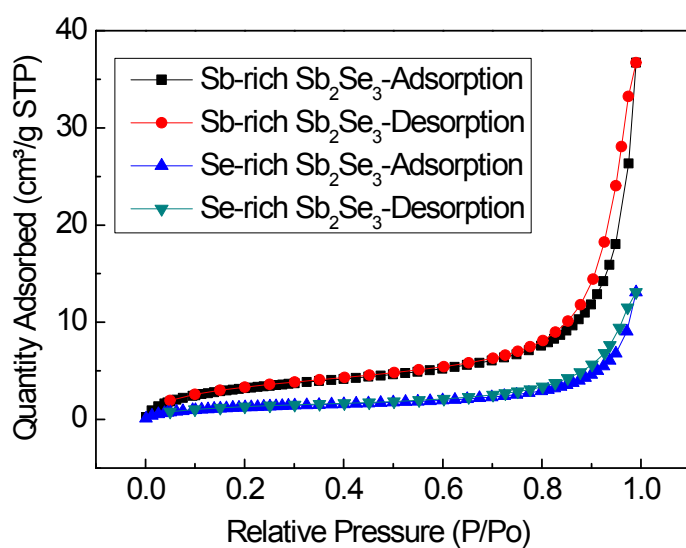

Fig. S2  $N_2$  adsorption–desorption isotherms of Sb-rich  $Sb_2Se_3$  and Se-rich  $Sb_2Se_3$  samples

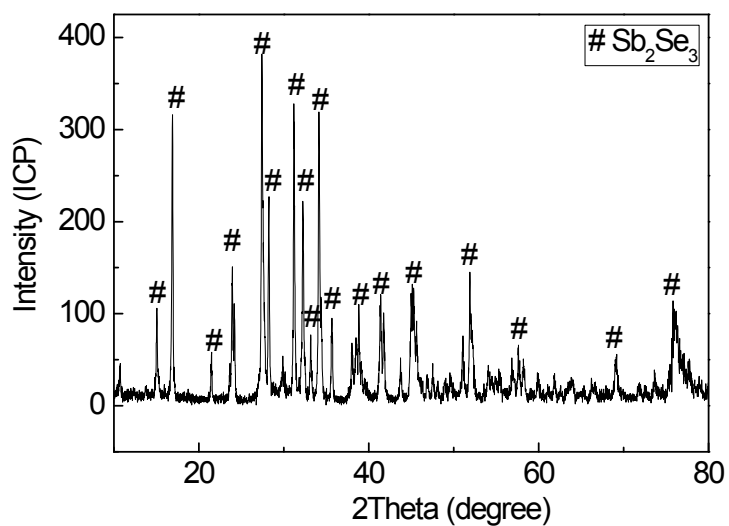

Fig. S3 XRD pattern of  $Sb_2Se_3$  sample synthesized by a hydrothermal method at 180 °C with the ratio of Sb/Se 1:1.5 for 10 h

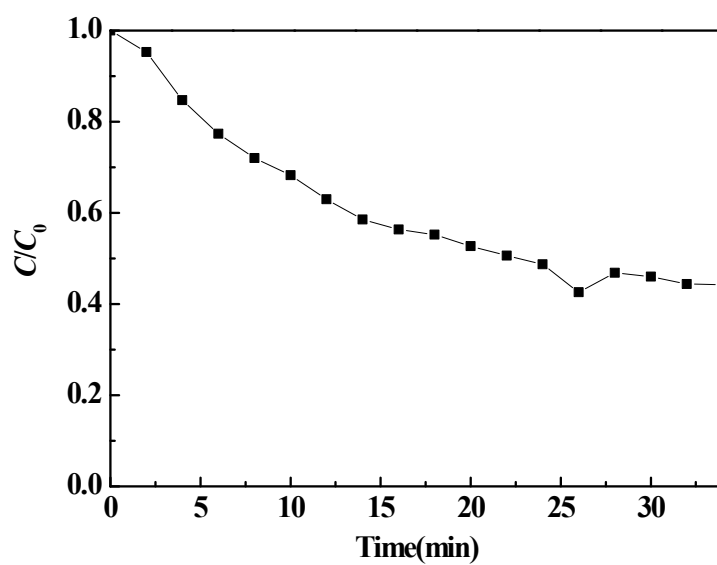

Fig. S4 Plot of ( $c_t/c_0$ ) versus reaction time in the presence of the  $Sb_2Se_3$  synthesized by a hydrothermal method at 180 °C with the ratio of Sb/Se 1:1.5 for 10 h
